# Supplementary material for: Analysis of Kojic Acid Derivatives as Competitive Inhibitors of Tyrosinase: A Molecular Modeling Approach
Source: MDPI journal article supplement (doi:10.3390/molecules26102875), 2021-05-12
Supplement: s1 [file s1]

# Supporting Information

## Analysis of Kojic Acid Derivatives as Competitive Inhibitors of the Tyrosinase: a

### Molecular Modeling Approach

Richelly Cardoso <sup>1,3</sup>, Renan Valente <sup>2</sup>, Clauber Henrique Souza da Costa <sup>3</sup>, João Lidio da S. Gonçalves Vianez Júnior <sup>4</sup>, Kauê Santana da Costa <sup>3,5,\*</sup>, Fábio Alberto deMolfetta <sup>1</sup> and Cláudio Nahum Alves <sup>3,\*</sup>

- <sup>1</sup> Laboratório de Modelagem Molecular, Instituto de Ciências Exatas e Naturais, Universidade Federal do Pará – UFPA, Guamá, Belém - PA, 66075-10, Brazil
- <sup>2</sup> Laboratório de Sistemas Moleculares Complexos, Instituto de Ciências Exatas e Naturais, Universidade Federal do Pará – UFPA, Guamá, Belém - PA, 66075-10, Brazil
- <sup>3</sup> Laboratório de Planejamento e Desenvolvimento de Fármacos. Instituto de Ciências Exatas e Naturais, Universidade Federal do Pará – UFPA, Guamá, Belém - PA, 66075-10, Brazil
- <sup>4</sup> Center of Technological Innovation, Evandro Chagas Institute, Ministry of Health, Ananindeua, PA, 67030-000, Brazil
- <sup>5</sup> Universidade Federal do Oeste do Pará, Instituto de Biodiversidade, 68035-110, Santarém, PA Brazil

**Table S1.** Kojic acid derivatives identified by their ID (D1 to D14), interatomic distance to copper, molecular structure, and IUPAC name.

| Molecule ID | Interatomic distance to copper (Å) | Molecular structure                                                                  | IUPAC name                                                                                  |
|-------------|------------------------------------|--------------------------------------------------------------------------------------|---------------------------------------------------------------------------------------------|
| D1          | C=O .. Cu <sup>+2</sup> (3.762)    | 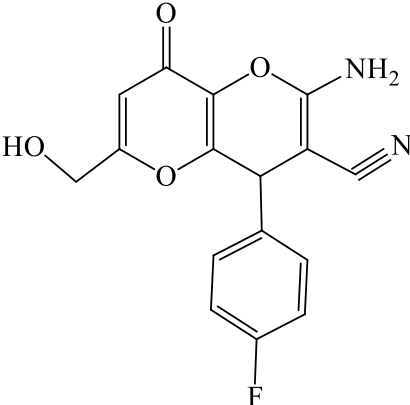 | 2-amino-4-(4-fluorophenyl)-6-(hydroxymethyl)-8-oxo-4H,8H-pyrano[3,2-b]pyran-3-carbonitrile  |
| D2          | C=O .. Cu <sup>+2</sup> (3.912)    |  | 2-amino-6-(hydroxymethyl)-4-(4-methoxyphenyl)-8-oxo-4H,8H-pyrano[3,2-b]pyran-3-carbonitrile |

|    |                                                    |                                                                                      |                                                                                                 |
|----|----------------------------------------------------|--------------------------------------------------------------------------------------|-------------------------------------------------------------------------------------------------|
| D3 | $\text{C}=\text{O} \cdots \text{Cu}^{+2}$ (3.693)  | 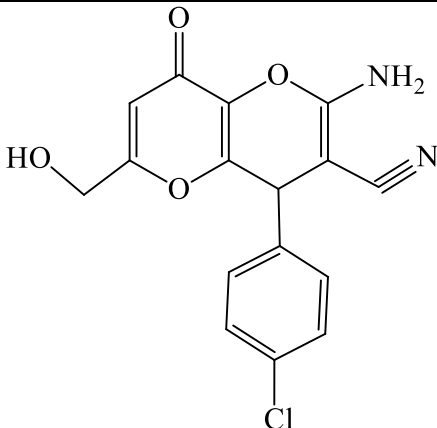   | 2-amino-4-(4-chlorophenyl)-6-(hydroxymethyl)-8-oxo-4H,8H-pyrano[3,2-b]pyran-3-carbonitrile      |
| D4 | $\text{C}=\text{O} \cdots \text{Cu}^{+2}$ (3.642)  |   | 2-amino-6-(hydroxymethyl)-4-(4-hydroxyphenyl)-8-oxo-4H,8H-pyrano[3,2-b]pyran-3-carbonitrile     |
| D5 | $\text{C}=\text{O} \cdots \text{Cu}^{+2}$ (3.715)  |  | 2-amino-6-(hydroxymethyl)-4-(2-hydroxyphenyl)-8-oxo-4H,8H-pyrano[3,2-b]pyran-3-carbonitrile     |
| D6 | $\text{C}=\text{O} \cdots \text{Cu}^{+2}$ (3.667)  |  | 2-amino-4-[3-(benzyloxy)phenyl]-6-(hydroxymethyl)-8-oxo-4H,8H-pyrano[3,2-b]pyran-3-carbonitrile |
| D7 | $\text{C}=\text{O} \cdots \text{Cu}^{+2}$ (12.213) |  | 2-(hydroxymethyl)-5-[(4-methoxyphenyl)methoxy]-4H-pyran-4-one                                   |

|     |                                  |                                                                                      |                                                                                                 |
|-----|----------------------------------|--------------------------------------------------------------------------------------|-------------------------------------------------------------------------------------------------|
| D8  | C=O .. Cu <sup>+2</sup> (7.040)  | 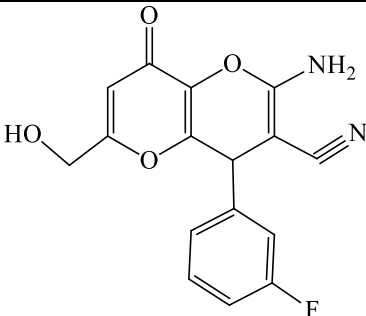   | 2-amino-4-(3-fluorophenyl)-6-(hydroxymethyl)-8-oxo-4H,8H-pyrano[3,2-b]pyran-3-carbonitrile      |
| D9  | C=O .. Cu <sup>+2</sup> (3.858)  |    | 2-amino-4-(2-chlorophenyl)-6-(hydroxymethyl)-8-oxo-4H,8H-pyrano[3,2-b]pyran-3-carbonitrile      |
| D10 | C=O .. Cu <sup>+2</sup> (8.144)  |   | 2-amino-4-[4-(benzyloxy)phenyl]-6-(hydroxymethyl)-8-oxo-4H,8H-pyrano[3,2-b]pyran-3-carbonitrile |
| D11 | C=O .. Cu <sup>+2</sup> (17.008) |  | 2-amino-4-[2(benzyloxy)phenyl]-6-(hydroxymethyl)-8-oxo-4H,8H-pyrano[3,2-b]pyran-3-carbonitrile  |

|     |                                  |                                                                                     |                                                                                             |
|-----|----------------------------------|-------------------------------------------------------------------------------------|---------------------------------------------------------------------------------------------|
| D12 | C=O .. Cu <sup>+2</sup> (3.667)  | 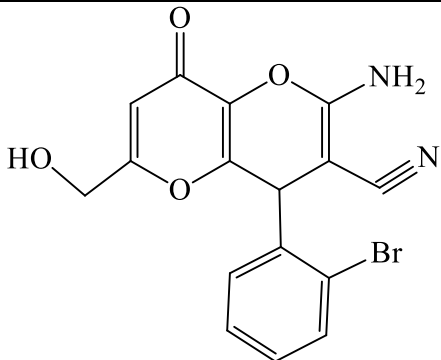  | 2-amino-4-(2-bromophenyl)-6-(hydroxymethyl)-8-oxo-4H,8H-pyrano[3,2-b]pyran-3-carbonitrile   |
| D13 | C=O .. Cu <sup>+2</sup> (3.771)  |   | 2-amino-4-(3-bromophenyl)-6-(hydroxymethyl)-8-oxo-4H,8H-pyrano[3,2-b]pyran-3-carbonitrile   |
| D14 | C=O .. Cu <sup>+2</sup> (11.516) |  | 2-amino-6-(hydroxymethyl)-4-(2-methoxyphenyl)-8-oxo-4H,8H-pyrano[3,2-b]pyran-3-carbonitrile |

**Table S2.** Parameters applied to guide the molecular docking simulations of the natural substrates (L-DOPA and L-tyrosinase), kojic acid and its derivatives (cavity radius = 12.193, spatial coordinates of the center of the cavity: x = 1.93, y = 101.58, z = 25.27).

| Parameters      | D1    | D2    | D3    | D4    | D5    | D6    | KA    | L-DOPA | L-Tyrosine |
|-----------------|-------|-------|-------|-------|-------|-------|-------|--------|------------|
| n-ops           | 35250 | 42000 | 35250 | 42000 | 42000 | 55250 | 28000 | 44000  | 35500      |
| n-islands       | 3     | 4     | 3     | 4     | 4     | 5     | 2     | 4      | 3          |
| Population size | 100   | 100   | 100   | 100   | 100   | 100   | 100   | 100    | 100        |
| mutation        | 95    | 95    | 95    | 95    | 95    | 95    | 95    | 95     | 95         |
| crossover       | 95    | 95    | 95    | 95    | 95    | 95    | 95    | 95     | 95         |
| migration       | 10    | 10    | 10    | 10    | 10    | 10    | 10    | 10     | 10         |
| pressure        | 1.100 | 1.100 | 1.100 | 1.100 | 1.100 | 1.100 | 1.100 | 1.100  | 1.100      |

**Table S3.** Average interatomic distances between the carbonyl (O1) 4H-pyrone group of the KA and the derivatives with coppers A and B obtained from MD simulation.

| Ligand               |      | D1    | D2    | D3    | D4    | D5    | D6    | KA    |
|----------------------|------|-------|-------|-------|-------|-------|-------|-------|
| Average distance (Å) | Cu-A | 4.250 | 4.240 | 3.693 | 4.073 | 4.011 | 4.070 | 4.790 |
|                      | Cu-B | 3.762 | 3.912 | 2.832 | 3.642 | 3.715 | 3.667 | 5.534 |

**Table S4.** Average interatomic distances between the histidine residues from the active site and the KA derivatives obtained from MD simulations.

| KA derivative D1 |                              |
|------------------|------------------------------|
| Histidine/Cu-A   | Average distance interaction |

|                         |                                     |
|-------------------------|-------------------------------------|
| His200 (NE2)            | 2.325 ± 0.08                        |
| His204 (NE2)            | 2.394 ± 0.11                        |
| His227 (NE2)            | 2.164 ± 0.04                        |
| <b>Histidine/Cu-B</b>   | <b>Average distance interaction</b> |
| His38 (NE2)             | 2.165 ± 0.04                        |
| His56 (NE2)             | 2.309 ± 0.08                        |
| His65 (NE2)             | 2.166 ± 0.04                        |
| <b>KA derivative D2</b> |                                     |
| <b>Histidine/Cu-A</b>   | <b>Average distance interaction</b> |
| His200 (NE2)            | 2.259 ± 0.08                        |
| His204 (NE2)            | 2.137 ± 0.04                        |
| His227 (NE2)            | 2.152 ± 0.05                        |
| <b>Histidine/Cu-B</b>   | <b>Average distance interaction</b> |
| His38 (NE2)             | 2.235 ± 0.09                        |
| His56 (NE2)             | 2.235 ± 0.10                        |
| His65 (NE2)             | 2.181 ± 0.05                        |
| <b>KA derivative D3</b> |                                     |
| <b>Histidine/Cu-A</b>   | <b>Average distance interaction</b> |
| His200 (NE2)            | 2.238 ± 0.07                        |
| His204 (NE2)            | 2.140 ± 0.04                        |
| His227 (NE2)            | 2.162 ± 0.06                        |
| <b>Histidine/Cu-B</b>   | <b>Average distance interaction</b> |
| His38 (NE2)             | 2.245 ± 0.09                        |
| His56 (NE2)             | 2.206 ± 0.07                        |
| His65 (NE2)             | 2.171 ± 0.04                        |
| <b>KA derivative D4</b> |                                     |
| <b>Histidine/Cu-A</b>   | <b>Average distance interaction</b> |
| His200 (NE2)            | 2.261 ± 0.08                        |
| His204 (NE2)            | 2.127 ± 0.04                        |
| His227 (NE2)            | 2.149 ± 0.04                        |
| <b>Histidine/Cu-B</b>   | <b>Average distance interaction</b> |
| His38 (NE2)             | 2.169 ± 0.04                        |
| His56 (NE2)             | 2.281 ± 0.11                        |
| His65 (NE2)             | 3.176 ± 0.65                        |
| <b>KA derivative D5</b> |                                     |
| <b>Histidine/Cu-A</b>   | <b>Average distance interaction</b> |
| His200 (NE2)            | 2.273 ± 0.10                        |
| His204 (NE2)            | 2.138 ± 0.04                        |
| His227 (NE2)            | 2.151 ± 0.20                        |
| <b>Histidine/Cu-B</b>   | <b>Average distance interaction</b> |
| His38 (NE2)             | 2.152 ± 0.04                        |
| His56 (NE2)             | 2.160 ± 0.04                        |
| His65 (NE2)             | 2.156 ± 0.06                        |
| <b>KA derivative D6</b> |                                     |
| <b>Histidine/Cu-A</b>   | <b>Average distance interaction</b> |
| His200 (NE2)            | 2.162 ± 0.06                        |
| His204 (NE2)            | 2.141 ± 0.04                        |
| His227 (NE2)            | 2.295 ± 0.14                        |
| <b>Histidine/Cu-B</b>   | <b>Average distance interaction</b> |
| His38 (NE2)             | 2.280 ± 0.17                        |
| His56 (NE2)             | 2.246 ± 0.10                        |
| His65 (NE2)             | 2.179 ± 0.05                        |
| <b>Kojic acid</b>       |                                     |
| <b>Histidine/Cu-A</b>   | <b>Average distance interaction</b> |
| His200 (NE2)            | 2.383 ± 0.11                        |
| His204 (NE2)            | 2.185 ± 0.04                        |
| His227 (NE2)            | 2.197 ± 0.08                        |
| <b>Histidine/Cu-B</b>   | <b>Average distance interaction</b> |
| His38 (NE2)             | 2.233 ± 0.08                        |

|             |                  |
|-------------|------------------|
| His56 (NE2) | $2.218 \pm 0.13$ |
| His65 (NE2) | $3.242 \pm 0.62$ |

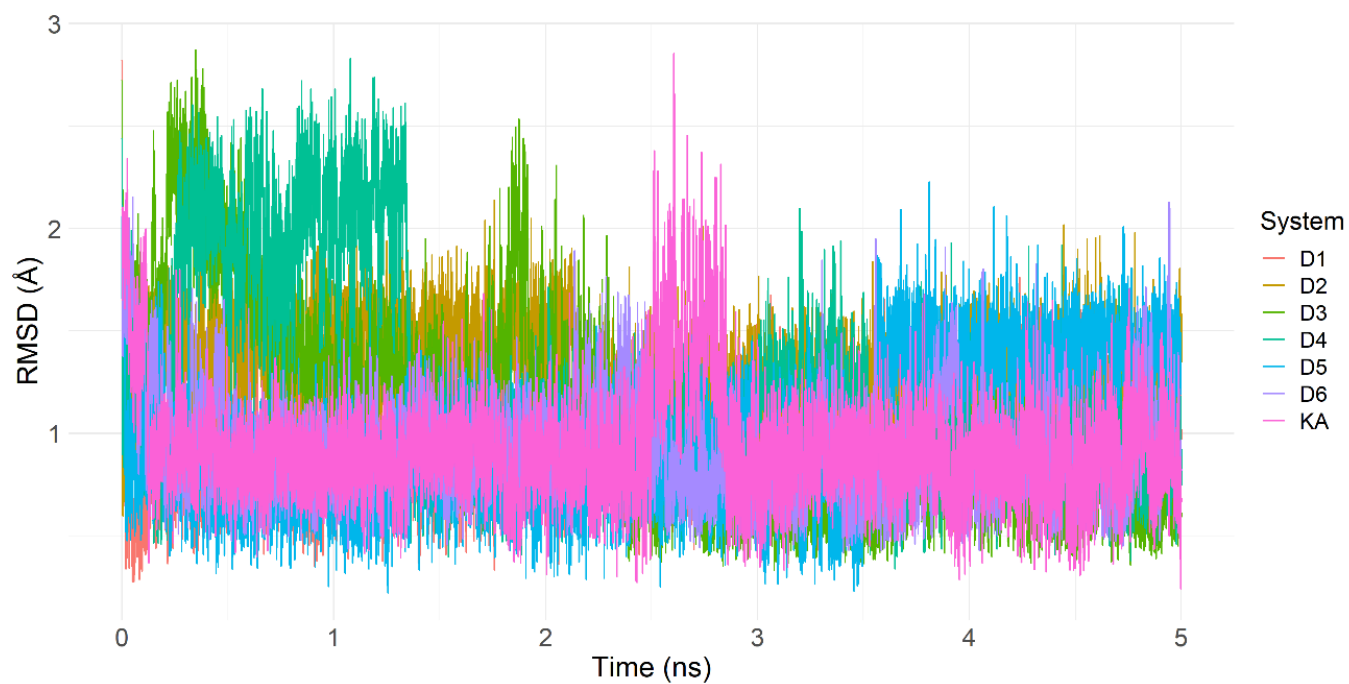

**Figure S1.** RMSD plot of KA and its derivatives complexed with tyrosinase obtained over 5ns of MD simulation.

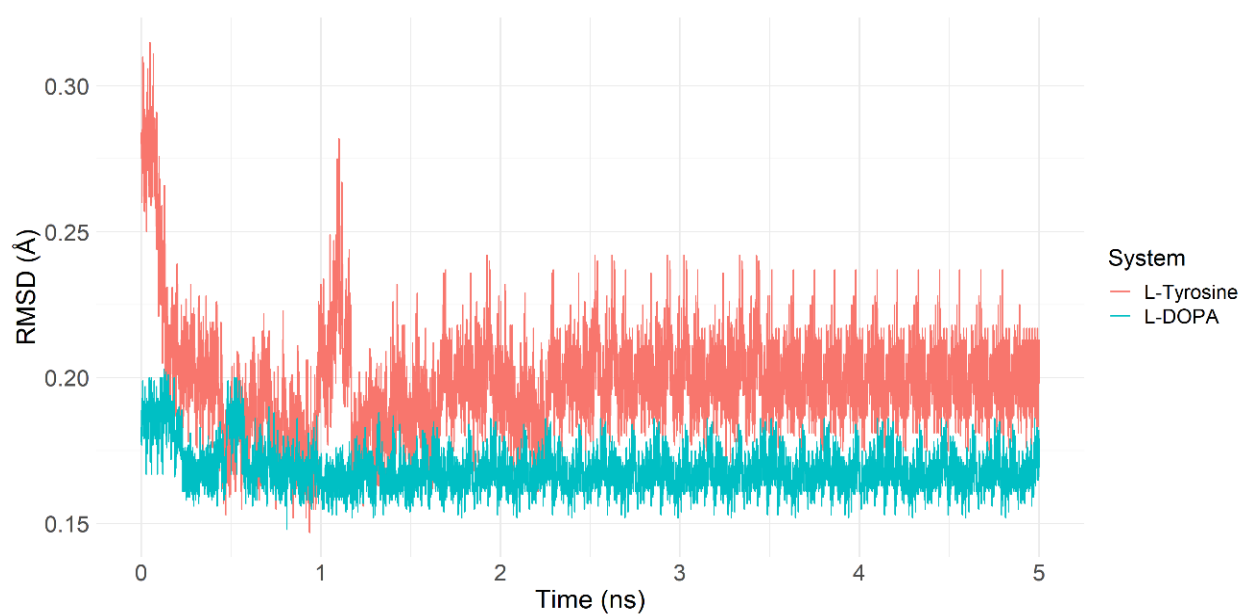

**Figure S2.** RMSD plot of the natural substrates (L-tyrosine and L-DOPA) obtained over 5ns of MD simulation.

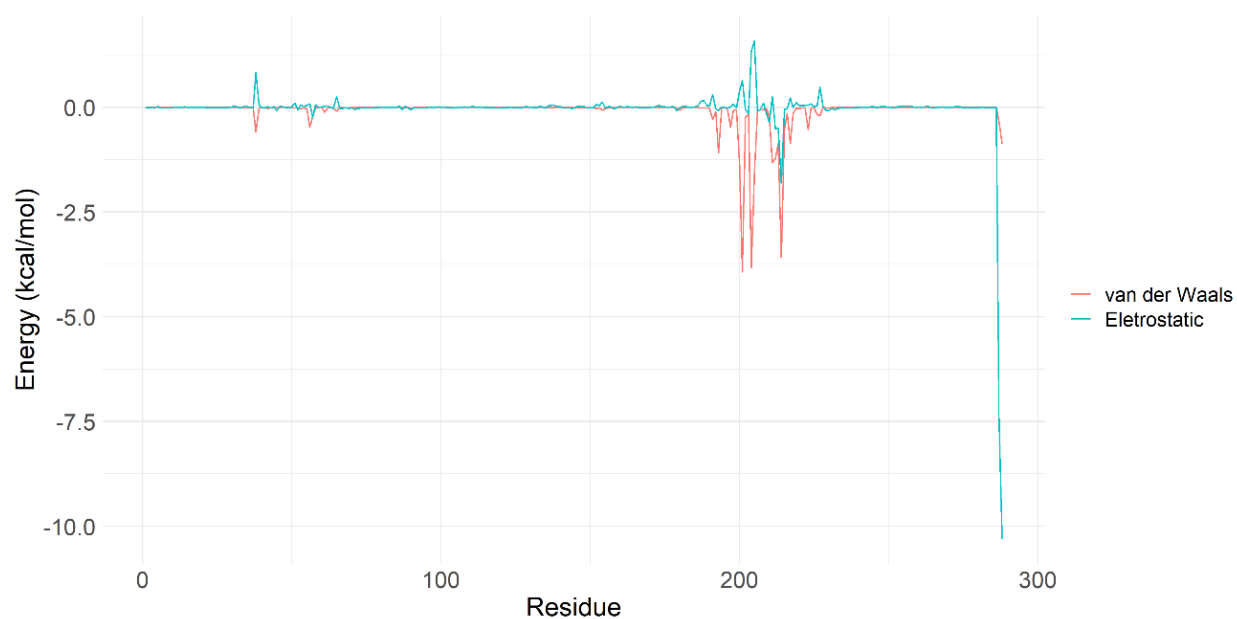

**Figure S3.** Energy decomposition of the natural substrate L-DOPA complexed with the tyrosinase binding site.

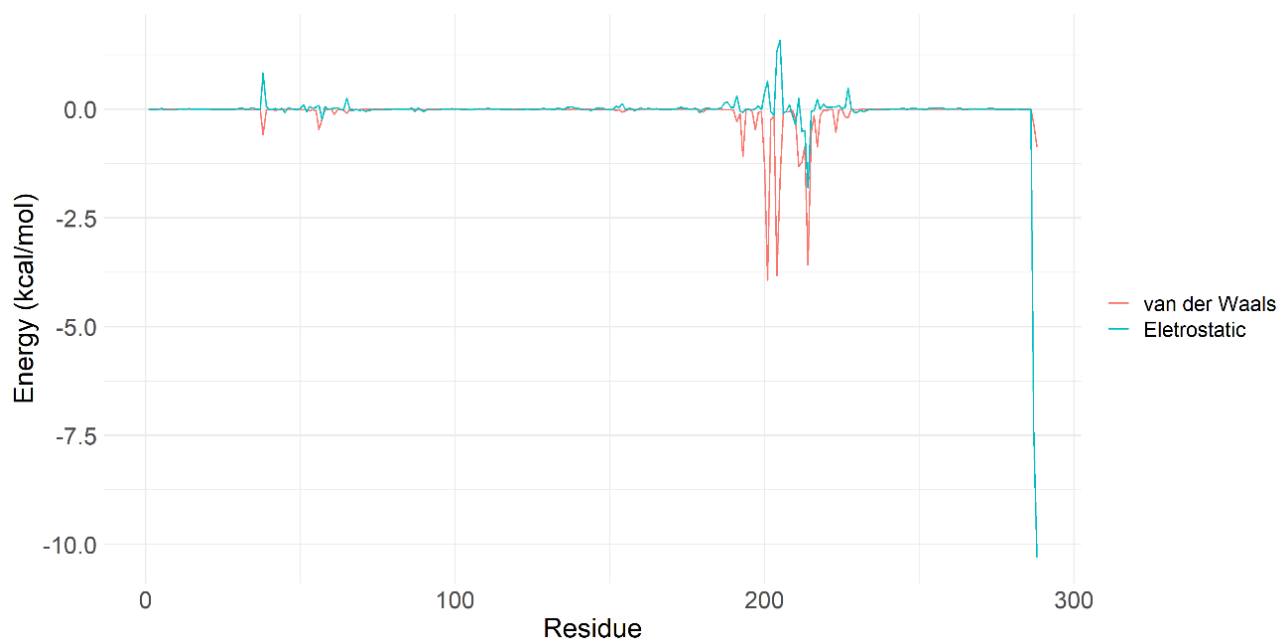

**Figure S4.** Energy decomposition of the natural substrate L-tyrosine complexed with the tyrosinase binding site.

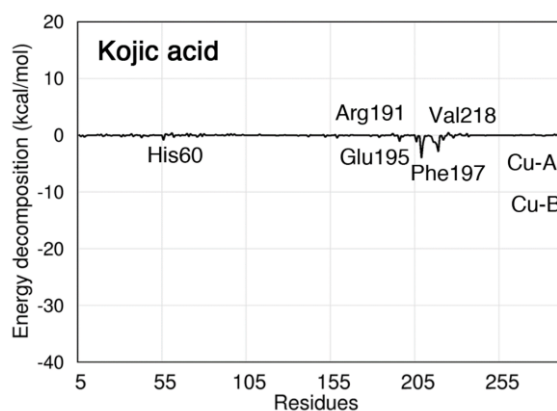

**Figure S5.** Binding free energy decomposition per residue of tyrosinase complexed with the kojic acid.

**Table S5.** Structural and physicochemical properties calculated for kojic acid and its derivatives.

| CdId | Structure                                                                           | Mol Weight | Formula      | Name | LogD  | LogP  | Molecular weight | TPSA   | H bond acceptors | H bond donors | Atom count | Rotatable bonds | Ring count | Lipinski (4 of 4) | Muegge | Veber |
|------|-------------------------------------------------------------------------------------|------------|--------------|------|-------|-------|------------------|--------|------------------|---------------|------------|-----------------|------------|-------------------|--------|-------|
| 1    | 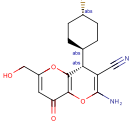   | 320,32     | C16H17FN2O4  | D1   | 0,646 | 0,646 | 320,32           | 105,57 | 6                | 2             | 40         | 2               | 3          | true              | true   | true  |
| 2    |    | 332,356    | C17H20N2O5   | D2   | 0,398 | 0,398 | 332,356          | 114,8  | 7                | 2             | 44         | 3               | 3          | true              | true   | true  |
| 3    |    | 336,77     | C16H17ClN2O4 | D3   | 1,110 | 1,110 | 336,77           | 105,57 | 6                | 2             | 40         | 2               | 3          | true              | true   | true  |
| 4    |    | 318,329    | C16H18N2O5   | D4   | 0     | 0     | 318,329          | 125,8  | 7                | 3             | 41         | 2               | 3          | true              | true   | true  |
| 5    |   | 318,329    | C16H18N2O5   | D5   | 0     | 0     | 318,329          | 125,8  | 7                | 3             | 41         | 2               | 3          | true              | true   | true  |
| 6    |  | 414,502    | C23H30N2O5   | D6   | 2,513 | 2,513 | 414,502          | 114,8  | 7                | 2             | 60         | 5               | 4          | true              | true   | true  |



**Table S6.** Average distance (Å, standard deviation in parenthesis) of the hydrogen bond interactions computed over the MD simulation for the analyzed KA and its derivatives (D1 to D6).

| Inhibitor atoms | Residues        | Distance        | Inhibitor atoms | Residues        | Distance        |
|-----------------|-----------------|-----------------|-----------------|-----------------|-----------------|
| <b>D1</b>       |                 |                 | <b>D2</b>       |                 |                 |
| O2              | Asn205-ND2      | 3.58 (0.41)     | O3              | Glu195-OE2      | 2.63 (0.11)     |
|                 | Glu195-OE2      | 2.63 (0.10)     |                 | Gly216-O        | 2.87 (0.28)     |
| O3              | Asn205-ND2      | 5.04 (0.56)     | N1              | Val217-O        | 4.75 (1.44)     |
|                 | His208-ND1      | 3.54 (0.37)     |                 | Met215-O        | 4.17 (1.03)     |
|                 | Met215-O        | 4.86 (0.67)     | N2              | Arg209-NH2      | 5.65 (1.04)     |
| N1              | Val217-O        | 5.01 (1.16)     |                 |                 |                 |
|                 | Val218-N        | 4.64 (1.06)     |                 |                 |                 |
|                 | Gly216-O        | 2.97 (0.28)     |                 |                 |                 |
| N2              | Arg209-NH1      | 5.04 (1.01)     |                 |                 |                 |
|                 |                 |                 |                 |                 |                 |
| <b>D3</b>       | <b>Residues</b> | <b>Distance</b> | <b>D4</b>       | <b>Residues</b> | <b>Distance</b> |
|                 | His60-ND1       | 4.23 (0.62)     |                 | Glu195-OE2      | 2.59 (0.09)     |
| O3              | Met61-SD        | 4.88 (0.73)     | O3              | Asn205-ND2      | 5.24 (0.68)     |
|                 | Glu195-OE2      | 2.92 (0.52)     |                 | Arg209-NE       | 5.41 (1.37)     |
|                 | Asn205-ND2      | 5.87 (0.81)     |                 | Arg209-NH1      | 6.08 (1.21)     |
|                 | His208-ND1      | 4.31 (0.72)     | N1              | Met215-O        | 4.49 (1.00)     |
|                 | Arg209-NH1      | 5.78 (0.98)     |                 | Gly216-O        | 3.04 (0.65)     |
| N1              | Met215-O        | 3.46 (0.85)     |                 | Val217-O        | 4.80 (1.25)     |
|                 | Gly216-O        | 2.91 (0.32)     | N2              | Arg209-NH1      | 5.05 (0.72)     |
|                 | Val217-O        | 3.95 (1.14)     |                 | Arg209-NE       | 4.02 (0.52)     |
| N2              | Arg209-NH1      | 4.24 (0.81)     |                 |                 |                 |
|                 | Arg209-NE       | 5.46 (0.88)     |                 |                 |                 |
|                 |                 |                 |                 |                 |                 |
| <b>D5</b>       | <b>Residues</b> | <b>Distance</b> | <b>D6</b>       | <b>Residues</b> | <b>Distance</b> |
| O2              | Asn205-ND2      | 5.41 (0.43)     |                 | Met61-N         | 3.77 (0.38)     |
| O3              | Glu195-OE2      | 2.61 (0.09)     | O3              | Glu195-OE2      | 2.54 (0.08)     |
| O5              | Asn205-ND2      | 3.85 (0.50)     |                 | His208-ND1      | 3.33 (0.26)     |
|                 | Met215-O        | 3.12 (0.29)     | N1              | Met215-O        | 3.05 (0.21)     |
| N1              | Gly216-O        | 3.19 (0.78)     |                 | Gly216-O        | 2.92 (0.34)     |
|                 | Val217-O        | 3.14 (0.37)     |                 | Val217-O        | 3.74 (0.78)     |
| N2              | Arg209-NH1      | 4.90 (0.75)     | N2              | Arg209-NH1      | 5.38 (0.71)     |
|                 |                 |                 |                 |                 |                 |
| <b>KA</b>       | <b>Residues</b> | <b>Distance</b> |                 |                 |                 |
|                 | Asn205-OD1      | 5.33 (1.17)     |                 |                 |                 |
|                 | Asn205-ND2      | 6.17 (1.03)     |                 |                 |                 |
|                 | Arg209-NH1      | 5.87 (0.87)     |                 |                 |                 |
| O1              | Arg209-NE       | 5.188 (0.69)    |                 |                 |                 |
|                 | Met215-O        | 4.53 (1.02)     |                 |                 |                 |
|                 | Gly216-O        | 4.08 (0.59)     |                 |                 |                 |
|                 | Val217-O        | 5.82 (1.14)     |                 |                 |                 |
| O4              | Asn205-OD1      | 5.40 (0.96)     |                 |                 |                 |

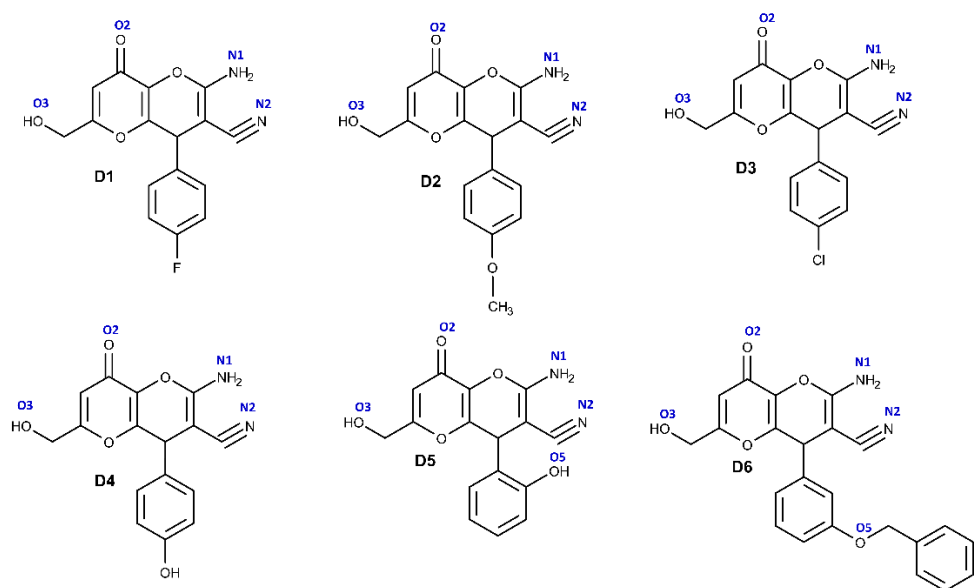

**Figure S6.** Heavy atoms numbering of the KA derivatives (D1 to D6).
